# Supplementary material
Source: PubMed Central journal article supplement (PMC4007981)

Supplementary Figure 1. Elution profiles of chaperone peptides from a Sephadex G-50 column.

Mini- $\alpha$ A- and CP1 peptide (0.2 mg/ml each) were incubated at 37°C in 50 mM PO<sub>4</sub> buffer (containing 150mM NaCl + 100 mM EDTA, pH7.2) for 2 hrs. The samples were applied to a Sephadex G-50 column (1 cm X 45 cm) equilibrated with the buffer without EDTA before and after incubation. The flow rate was set to 0.5 ml/min and the elution profile was recorded at 215 nm in a Jasco spectrophotometer fitted with a flow cell.

Mini- $\alpha$ A- eluted in two peaks before incubation and as one peak, near the void volume of the column, after incubation at 37°C indicating the formation of larger aggregates whereas the CP1 peptide eluted at monomeric mass before and after incubation. The arrow mark corresponds to the elution peak for lysozyme (14kDa).

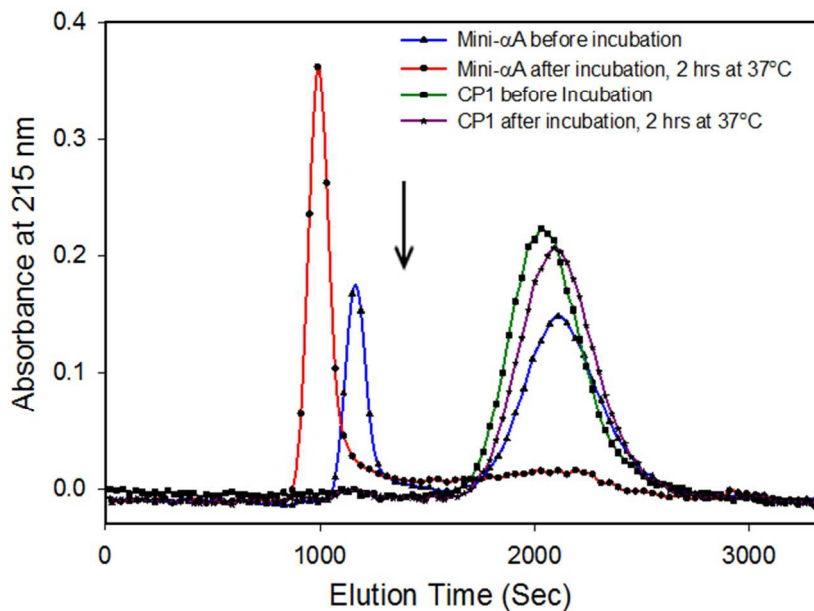

Supplement: bi4017268_si_002.pdf [file bi4017268_si_002.pdf]
